# Supplementary material for: A chromEM-staining protocol optimized for cardiac tissue
Source: Frontiers journal article supplement (doi:10.3389/fcell.2023.1123114), 2023-07-05
Supplement: Image_1.pdf [file Image_1.pdf]

## A ChromEM-staining protocol optimized for cardiac tissue

1 **Elettra Musolino<sup>1</sup>, Christina Pagiatakis<sup>2</sup>, Federica Pierin<sup>1</sup>, Daniele Sabatino<sup>3</sup>, Giovanna Finzi<sup>3</sup>,**  
2 **Rosalba Gornati<sup>1</sup>, Giovanni Bernardini<sup>1</sup>, Roberto Papait<sup>1,2\*</sup>**

3 <sup>1</sup>Department of Biotechnology and Life Sciences, University of Insubria, Varese, Italy

4 <sup>2</sup>Department of Cardiovascular Medicine, Humanitas Research Hospital - IRCCS, Rozzano (MI),  
5 Italy

6 <sup>3</sup>Department of Pathology, ASST Sette Laghi, Varese, Italy

7 **\* Correspondence:**

8 Roberto Papait: [roberto.papait@uninsubria.it](mailto:roberto.papait@uninsubria.it)

9    **Supplementary figures**

10    **Figure S1.** (A) Representative TEM images of cardiac tissue after conventional staining (lead citrate  
11    plus uranyl acetate), (B) after ChromEM staining (saponin 90 min, DRAQ5 O/N, and DAB 6h) in the  
12    dark with subsequent lead citrate plus uranyl acetate staining, and after ChromEM staining in the  
13    presence of light (C) with subsequent lead citrate and uranyl acetate, (D) lead citrate only, and (E)  
14    uranyl acetate only.

15    **Figure S2.** (A) The area and perimeter of nuclei and the minor axis of the peripheral heterochromatin  
16    were measured in cardiomyocytes using the "freehand selections" tool of ImageJ. (B) The length of  
17    the internal nuclear membrane in contact with peripheral heterochromatin was measured using the  
18    "freehand lines" tool of ImageJ. The area of peripheral heterochromatin (C) and heterochromatin  
19    dispersed in the nuclei (D) were measured using the "wand tool" command of ImageJ.

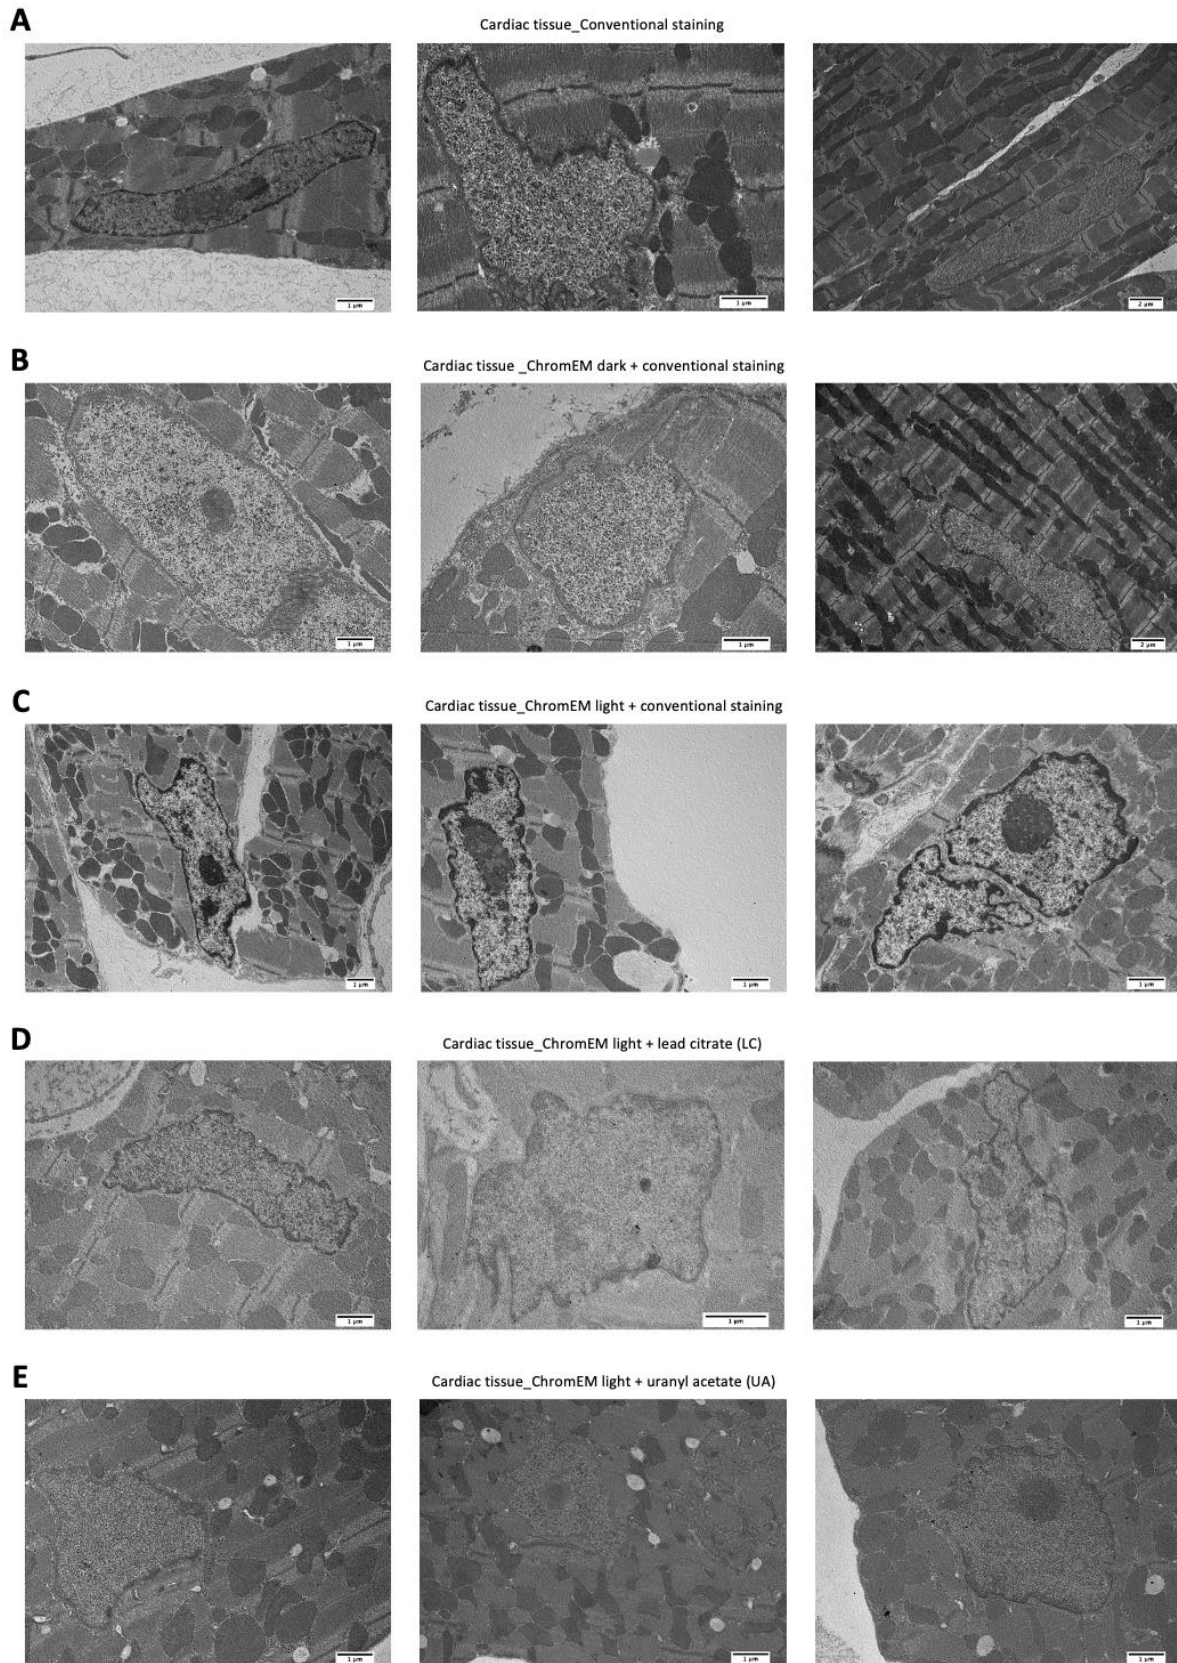

A

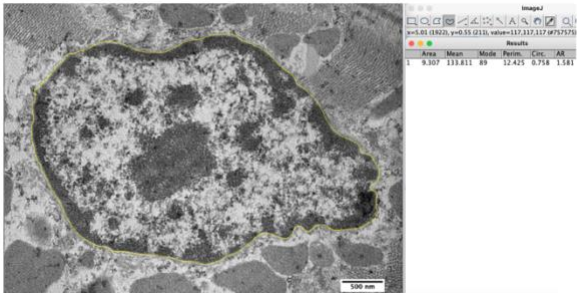

B

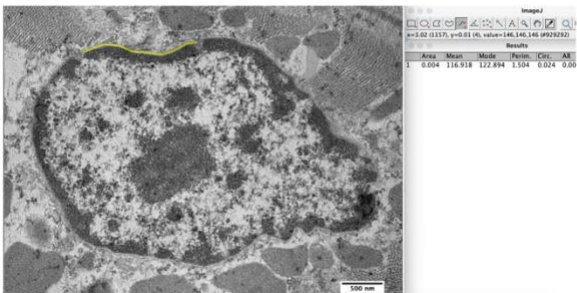

C

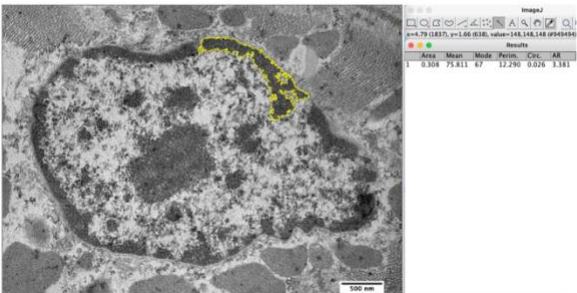

D

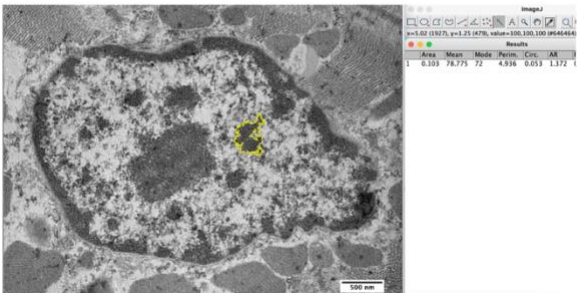

Figure S2
